# Supplementary material for: Telomere length in leucocytes and solid tissues of young and aged rats
Source: publisher site journal article supplement (doi:10.18632/aging.203922), 2022-02-27
Supplement: Supplementary file [file aging-v14i4-203922-supplementary-material-SD1.pdf]

## SUPPLEMENTARY TABLE

**Supplementary Table 1. Relative telomere length, telomerase and shelterin gene expression in PBMCs and solid organs.**

| <i>Cell/Tissue</i>  | <i>RTL</i>                  |                              | <i>TERT</i><br><i>mRNA expression</i> |                              | <i>TERF-1</i><br><i>mRNA expression</i> |                                | <i>TERF-2</i><br><i>mRNA expression</i> |                              |
|---------------------|-----------------------------|------------------------------|---------------------------------------|------------------------------|-----------------------------------------|--------------------------------|-----------------------------------------|------------------------------|
|                     | Young                       | Old                          | Young                                 | Old                          | Young                                   | Old                            | Young                                   | Old                          |
| <i>PBMCs</i>        | 0.88 ± 0.15                 | 0.92 ± 0.11                  |                                       |                              |                                         |                                |                                         |                              |
| <i>Spleen</i>       | 0.83 ± 0.14                 | 0.88 ± 0.21                  | 0.11 ± 0.03                           | 0.13 ± 0.06*                 | 4.21 ± 2.91                             | 4.26 ± 1.65                    | 1.38 ± 0.53                             | 1.85 ± 0.53 <sup>§§§§</sup>  |
| <i>Liver</i>        | 0.99 ± 0.16 <sup>§§</sup>   | 0.91 ± 0.09                  | 3.55 ± 1.92 <sup>§§§§</sup>           | 3.99 ± 2.33 <sup>§§§§</sup>  | 8.52 ± 4.50 <sup>§§§§</sup>             | 19.08 ± 15.30 <sup>§§§§§</sup> | 3.95 ± 2.24 <sup>§§§§</sup>             | 6.84 ± 3.24 <sup>§§§§§</sup> |
| <i>Kidney</i>       | 0.96 ± 0.13 <sup>§</sup>    | 0.91 ± 0.11                  | 0.52 ± 0.23 <sup>§§§§</sup>           | 0.5 ± 0.12 <sup>§§§§</sup>   | 5.46 ± 2.01                             | 7.54 ± 3.13 <sup>§§§§</sup>    | 4.29 ± 1.19 <sup>§§§§</sup>             | 3.76 ± 1.00 <sup>§§§§</sup>  |
| <i>Muscle</i>       | 1.08 ± 0.30 <sup>§§§§</sup> | 0.96 ± 0.14                  | 0.09 ± 0.05                           | 0.21 ± 0.20*                 | 6.12 ± 2.88                             | 7.89 ± 3.63 <sup>§§§§</sup>    | 4.46 ± 1.18 <sup>§§§§</sup>             | 5.04 ± 1.82 <sup>§§§§</sup>  |
| <i>Aorta</i>        | 0.98 ± 0.15 <sup>§</sup>    | 0.76 ± 0.11 <sup>§§§§§</sup> | 0.24 ± 0.20 <sup>§§</sup>             | 0.2 ± 0.12 <sup>§</sup>      | 1.83 ± 1.30 <sup>§§§§</sup>             | 1.28 ± 0.75 <sup>§§§§</sup>    | 2.23 ± 1.06 <sup>§§</sup>               | 1.35 ± 0.37 <sup>§§§§§</sup> |
| <i>Intestine</i>    | 0.64 ± 0.26 <sup>§§§§</sup> | 0.71 ± 0.27 <sup>§§</sup>    | 0.04 ± 0.03 <sup>§§§§</sup>           | 0.05 ± 0.04 <sup>§§§§</sup>  | 1.24 ± 0.91 <sup>§§§§</sup>             | 1.25 ± 0.77 <sup>§§§§</sup>    | 0.68 ± 0.28 <sup>§§§§</sup>             | 0.70 ± 0.54 <sup>§§§§</sup>  |
| <i>Brain</i>        | 0.84 ± 0.09                 | 0.88 ± 0.17                  | 0.21 ± 0.16 <sup>§</sup>              | 0.16 ± 0.08                  | 5.93 ± 2.19 <sup>§§</sup>               | 5.28 ± 2.00                    | 7.59 ± 3.34 <sup>§§§§</sup>             | 5.79 ± 2.18 <sup>§§§§</sup>  |
| <i>Lung</i>         | 0.76 ± 0.14 <sup>§§§§</sup> | 0.85 ± 0.14 <sup>*§</sup>    | 0.14 ± 0.07                           | 0.16 ± 0.04                  | 8.33 ± 4.20 <sup>§§§§</sup>             | 4.19 ± 2.30 <sup>§§§§</sup>    | 1.99 ± 0.69 <sup>§§</sup>               | 2.79 ± 1.01 <sup>§§§§§</sup> |
| <i>Visceral fat</i> | 0.83 ± 0.14                 | 0.92 ± 0.16*                 | 0.15 ± 0.03 <sup>§§§§</sup>           | 0.26 ± 0.09 <sup>§§§§§</sup> | 1.4 ± 0.41 <sup>§§</sup>                | 3.26 ± 2.03 <sup>§§§§</sup>    | 1.93 ± 0.46 <sup>§§§§</sup>             | 2.22 ± 0.56 <sup>§</sup>     |

Data are presented as means ± SD; significant differences were highlighted between young and adult animals (\*), and vs. PBMCs for RTL (‡) or spleen for gene expression analysis (§) in either young or adult animals. \**p* < 0.05, \*\**p* < 0.01, \*\*\**p* < 0.001 vs. young; ‡*p* < 0.05, §*p* < 0.01, §§*p* < 0.001 vs. reference tissue.
